# Supplementary material for: Truncating mutations in TAF4B and ZMYND15 causing recessive azoospermia
Source: HighWire-hosted journal article supplement (doi:10.1136/jmedgenet-2013-102102), 2014-01-15

**Supplementary Figure S1** Multipoint LOD scores based on a recessive model with full penetrance. Only chromosomes that yield scores >2 are presented.

**Family 1**

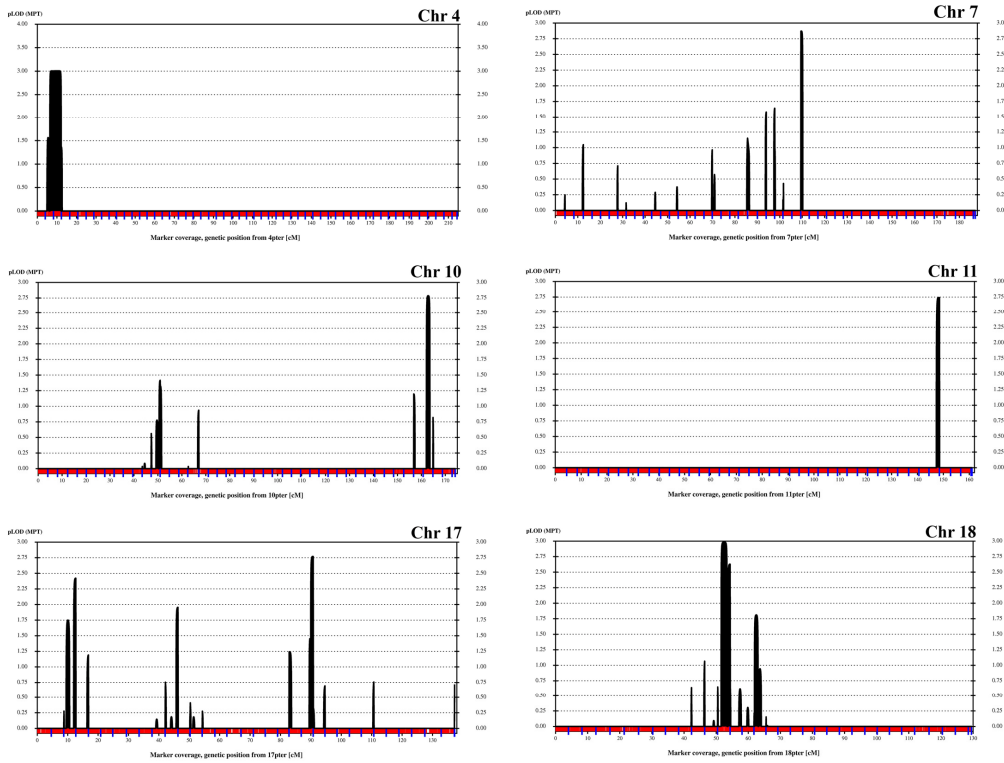

**Family 2**

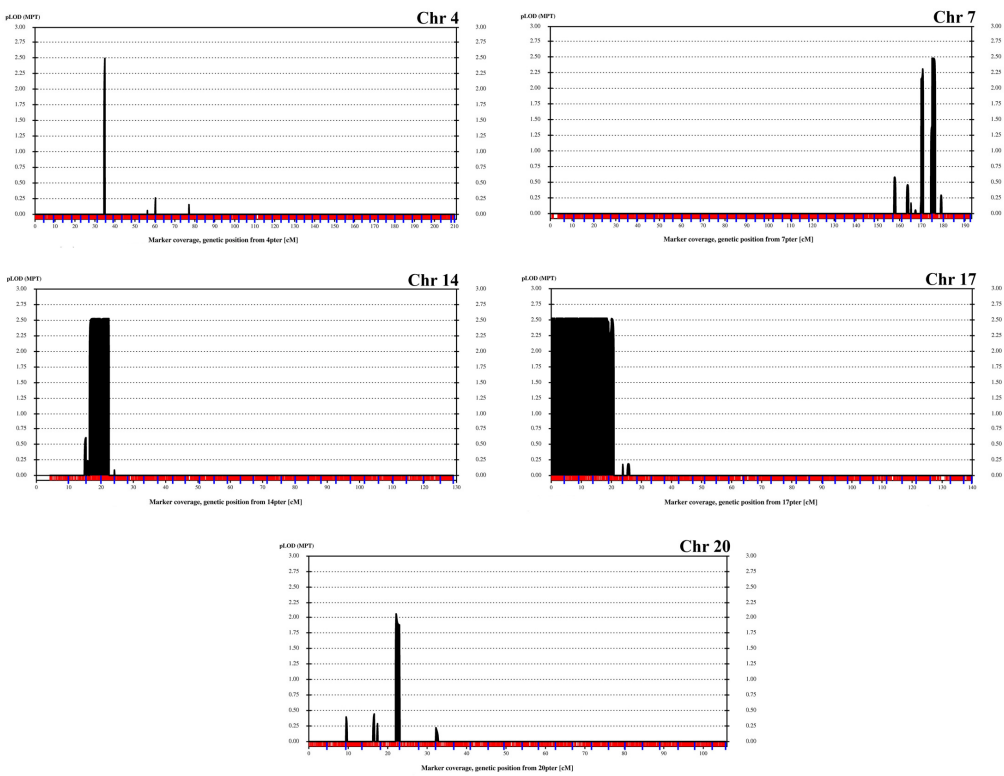

**Supplementary Figure S2** Chromatograms showing the identified mutations in a homozygous individual and the reference sequence.

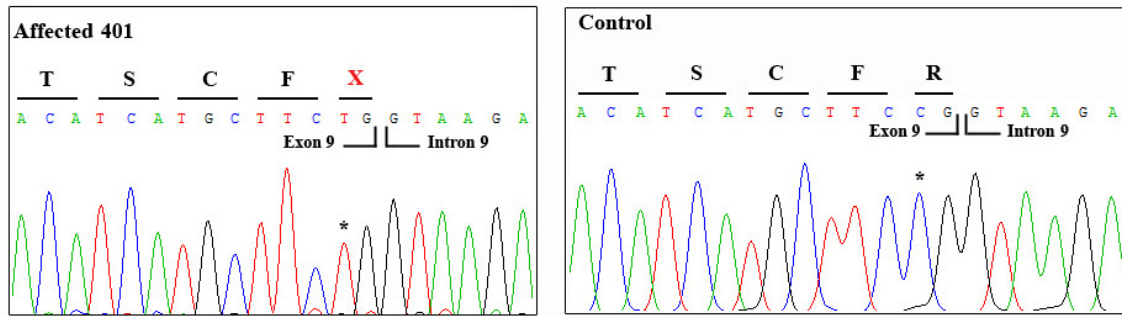

*TAF4B* c.1831 C>T (p.R611X) in family 1

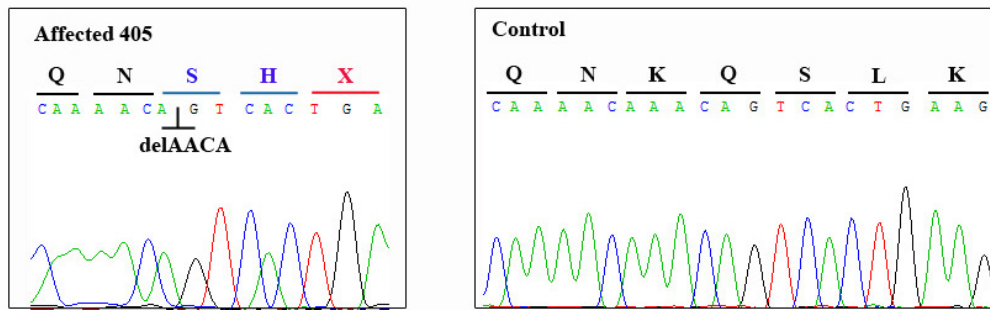

*ZMYND15* c.1520delAACA (p.K507Sfs\*3) in family 2

**Supplementary Figure S3** Quantification of transcript levels for ZMYND15 isoforms 1 and 2 relative to POLR2A in various tissues.

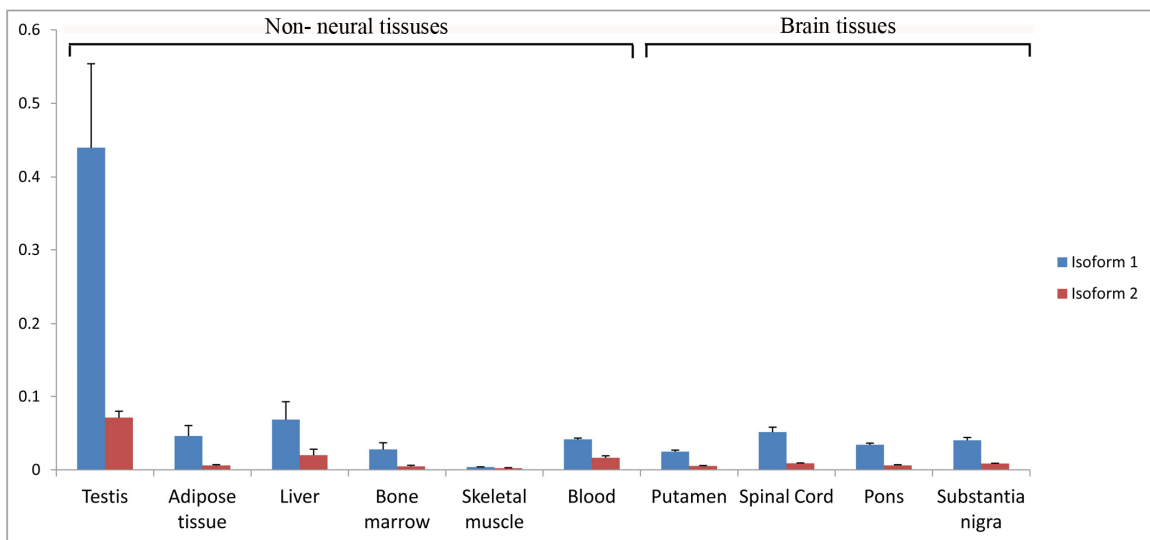

Supplement: jmedgenet-2013-102102supp_figs.pdf [file jmedgenet-2013-102102supp_figs.pdf]
