# Supplementary material for: Truncating mutations in TAF4B and ZMYND15 causing recessive azoospermia
Source: HighWire-hosted journal article supplement (doi:10.1136/jmedgenet-2013-102102), 2014-01-15
Supplement: jmedgenet-2013-102102supp_table1.pdf [file jmedgenet-2013-102102supp_table1.pdf]

**Supplementary Table S1.** Haplotypes with respect to selected SNP and microsatellite markers at the candidate loci. Affected subjects are highlighted in yellow and disease haplotypes are highlighted in gray. In family 2, the father's haplotypes are deduced.

**Family 1**

| Marker                      | Position (Mb) | Individual |        |        |        |
|-----------------------------|---------------|------------|--------|--------|--------|
|                             |               | 401 AS     | 405 AS | 407 AS | 409 AS |
| <b>Locus 4p16.2-4p15.32</b> |               |            |        |        |        |
| rs4689888                   | 4.56          | A B        | A B    | A B    | A B    |
| rs6446663                   | 4.57          | A A        | A A    | A A    | A A    |
| rs10005569                  | 4.72          | B B        | B B    | B B    | B B    |
| rs2968690                   | 4.90          | B B        | B B    | B B    | B B    |
| rs7692195                   | 5.06          | A A        | A A    | A A    | A A    |
| rs13128441                  | 5.16          | A A        | A A    | A A    | A A    |
| rs7669364                   | 5.28          | A A        | A A    | A A    | A A    |
| rs2654508                   | 5.42          | B B        | B B    | B B    | B B    |
| rs13138291                  | 5.55          | A A        | A A    | A A    | A A    |
| rs2276877                   | 5.85          | B B        | B B    | B B    | B B    |
| rs4398594                   | 6.15          | A A        | A A    | A A    | A A    |
| rs4689393                   | 6.28          | B B        | B B    | B B    | B B    |
| rs9291117                   | 6.447         | B B        | B B    | B B    | B B    |
| rs17779675                  | 6.449         | A B        | B B    | B B    | B B    |
| rs1574131                   | 8.04          | B A        | A A    | A A    | A A    |
| rs2014303                   | 10.58         | A B        | B B    | B B    | B B    |
| rs10029959                  | 12.57         | B A        | A A    | A A    | A A    |
| rs10939485                  | 13.53         | B B        | A A    | A A    | A B    |
| rs4698300                   | 14.86         | B A        | B B    | B B    | B A    |
| rs7359                      | 16.16         | A B        | A A    | A A    | A B    |
| rs2597749                   | 17.47         | A B        | A A    | A A    | A B    |
| rs1568228                   | 18.75         | B A        | B B    | B B    | B A    |
| rs1400931                   | 18.75         | A B        | B A    | B A    | B B    |
| <b>Locus 7q22.1</b>         |               |            |        |        |        |
| rs4729320                   | 96.55         | A B        | A B    | B B    | A B    |
| rs4727353                   | 96.56         | A A        | A A    | A B    | A A    |
| rs11973256                  | 97.09         | B B        | B B    | B A    | B B    |
| rs10085387                  | 97.38         | B B        | B B    | B A    | B B    |
| rs11772060                  | 97.78         | A A        | A A    | A B    | A A    |
| rs4729475                   | 98.31         | A A        | A A    | A B    | A A    |
| rs4236541                   | 98.83         | B B        | B B    | B A    | B B    |
| rs10274646                  | 98.83         | A A        | A A    | A A    | A A    |
| rs12705058                  | 98.93         | B B        | B B    | B B    | B B    |
| rs952319                    | 99.17         | B B        | B B    | B B    | B B    |
| rs10249369                  | 99.24         | A A        | A A    | A A    | A A    |
| rs776746                    | 99.27         | B B        | B B    | B B    | B B    |
| rs28365067                  | 99.27         | A A        | A A    | B A    | A A    |
| rs4646437                   | 99.36         | A A        | A A    | B A    | A A    |
| rs472660                    | 99.46         | B B        | B B    | A B    | B B    |
| rs6967487                   | 99.60         | A B        | A B    | A A    | A B    |
| <b>Locus 5p15.31</b>        |               |            |        |        |        |
| rs186893                    | 8.47          | A B        | A B    | B B    | B B    |
| rs180503                    | 8.47          | A A        | A A    | A A    | A A    |
| rs284422                    | 8.52          | B B        | B B    | B B    | B B    |



|                              |        |   |   |   |   |   |   |   |   |   |   |   |   |
|------------------------------|--------|---|---|---|---|---|---|---|---|---|---|---|---|
| D17S559                      | 4.76   | 3 | 2 | 3 | 1 | 3 | 3 | 3 | 3 | 3 | 3 | 2 | 3 |
| D17S1854                     | 5.66   | 2 | 2 | 2 | 1 | 2 | 2 | 2 | 2 | 2 | 2 | 2 | 2 |
| D17S1832                     | 5.97   | 3 | 1 | 3 | 2 | 3 | 3 | 3 | 3 | 3 | 3 | 1 | 3 |
| D17S1881                     | 6.52   | 2 | 1 | 2 | 1 | 2 | 2 | 2 | 2 | 2 | 2 | 1 | 2 |
| D17S906                      | 6.69   | 1 | 2 | 1 | 2 | 1 | 1 | 1 | 1 | 1 | 1 | 2 | 1 |
| rs2654189                    | 7.17   | B | A | B | A | B | B | B | B | B | B | A | B |
| rs3744405                    | 7.19   | A | A | B | A | A | B | A | B | A | B | A | B |
| D17S960                      | 7.25   | 1 | 2 | 2 | 1 | 1 | 2 | 1 | 2 | 1 | 2 | 2 | 2 |
| D17S720                      | 7.69   | 3 | 4 | 2 | 1 | 3 | 2 | 3 | 2 | 3 | 2 | 4 | 2 |
| <b>Locus 14p11.1-14q11.2</b> |        |   |   |   |   |   |   |   |   |   |   |   |   |
| rs8010057                    | 23.50  | A | A | B | B | A | B | A | B | A | B | A | B |
| rs10143875                   | 23.58  | A | B | A | B | A | A | A | A | A | A | B | A |
| D14S581                      | 24.29  | 1 | 2 | 1 | 2 | 1 | 1 | 1 | 1 | 1 | 1 | 2 | 1 |
| D14S64                       | 24.56  | 3 | 2 | 3 | 1 | 3 | 3 | 3 | 3 | 3 | 3 | 2 | 3 |
| D14S264                      | 25.28  | 2 | 1 | 2 | 1 | 2 | 2 | 2 | 2 | 2 | 2 | 1 | 2 |
| rs17278202                   | 26.33  | B | A | B | B | B | B | B | B | B | B | A | B |
| rs2332572                    | 26.34  | A | B | A | A | B | A | A | A | A | A | B | A |
| rs12894029                   | 27.61  | B | A | B | A | A | B | B | B | B | B | A | B |
| rs10142324                   | 28.64  | A | B | A | B | B | A | A | A | A | A | B | A |
| rs4141682                    | 29.20  | B | A | B | A | A | B | B | B | B | B | A | B |
| rs8018346                    | 29.80  | B | A | B | A | A | B | B | B | B | B | A | B |
| rs1952267                    | 29.88  | B | A | A | B | A | A | B | A | B | A | A | A |
| <b>Locus 7q36.2</b>          |        |   |   |   |   |   |   |   |   |   |   |   |   |
| rs4621714                    | 153.35 | A | A | B | A | A | B | A | B | A | B | A | B |
| rs4629774                    | 153.37 | A | B | A | A | A | A | A | A | A | A | B | A |
| rs1558300                    | 153.39 | B | A | B | A | B | B | B | B | B | B | A | B |
| rs10487688                   | 153.60 | B | A | B | A | B | B | B | B | B | B | A | B |
| rs6973850                    | 153.63 | A | B | A | B | A | A | A | A | A | A | B | A |
| rs1860218                    | 153.64 | A | A | A | B | A | A | A | A | A | A | A | A |
| rs10229774                   | 153.65 | B | B | A | B | B | A | B | A | B | A | B | A |

Abbreviations: F, father; M, mother, AS, affected son; US, unaffected son. Alleles A and B are for SNPs and alleles 1–4 are for microsatellites.
