# Supplementary material for: Truncating mutations in TAF4B and ZMYND15 causing recessive azoospermia
Source: HighWire-hosted journal article supplement (doi:10.1136/jmedgenet-2013-102102), 2014-01-15
Supplement: jmedgenet-2013-102102supp_table2.pdf [file jmedgenet-2013-102102supp_table2.pdf]

**Supplementary Table S2.** Candidate variants at the candidate loci. Novel/rare exonic (except synonymous) and splicing variants were selected, and those with alternative depth <60% of the total depth or not validated by inspection of sequence reads on BamView were filtered out. The strongest candidates for causative mutations are highlighted in pink.

**A. In patient 402 in family 1.**

| chr_name                                                               | chr_start | chr_end  | ref_base | alt_base | hom_het | np_qualit | tot_depth | alt_depth | region          | gene  | change        |
|------------------------------------------------------------------------|-----------|----------|----------|----------|---------|-----------|-----------|-----------|-----------------|-------|---------------|
| <b>Chromosome 4 rs4689888 (4569460 bp) - rs17779675 (6449514 bp)</b>   |           |          |          |          |         |           |           |           |                 |       |               |
| chr04                                                                  | 5755565   | 5755565  | G        | A        | hom     | 196       | 31        | 31        | exonic          | EVC   | nonsynonymous |
| <b>Chromosome 18 rs2339102 (23797853 bp) - rs1609839 (24027419 bp)</b> |           |          |          |          |         |           |           |           |                 |       |               |
| chr18                                                                  | 23873494  | 23873494 | C        | T        | hom     | 194       | 85        | 84        | exonic;splicing | TAF4B | stopgain      |

**Chromosome 7 rs4236541 (98830439 bp) - rs28365067 (99272310 bp)**

No candidate variants

**Chromosome 5 rs186893 (8473747 bp) - rs17225452 (8873310 bp)**

No variants because there are no genes in the region.

**B. In patient 402 in family 2.**

| chr_name                                            | chr_start | chr_end | ref_base | alt_base | hom_het | np_qualit | tot_depth | alt_depth | region | gene    | change         |
|-----------------------------------------------------|-----------|---------|----------|----------|---------|-----------|-----------|-----------|--------|---------|----------------|
| <b>Chromosome 17 pter to rs3744405 (7193255 bp)</b> |           |         |          |          |         |           |           |           |        |         |                |
| 17                                                  | 2276785   | 2276785 | G        | A        | hom     | 105       | 80        | 80        | exonic | SGSM2   | nonsynonymous  |
| 17                                                  | 4647504   | 4647507 | AAAC     | -        | hom     | 7893      | 112       | 101       | exonic | ZMYND15 | frameshift del |
| 17                                                  | 4863328   | 4863328 | G        | A        | hom     | 195       | 58        | 58        | exonic | SPAG7   | nonsynonymous  |

**Chromosome 14 rs8010057 (23506110 bp) - rs2332572 (26341293 bp)**

No candidate variants

**Chromosome 7 rs4621714 (153356432 bp) - rs10229774 (153652188 bp)**

No candidate variants

**PloyPhen score :** Ranges from 0 to 1, and 0 is benign and 1 is damaging.

**MutPred:** Score is the probability that the mutation is deleterious.

**SIFT score** ranges from 0 to 1. Amino acid substitution is predicted damaging if the score is  $\leq 0.05$  and tolerated if the score is  $\geq 0.05$ .

**Mutation Taster:** The probability value refers to the prediction, i.e. a value close to 1 indicates a high 'security' of the prediction.

| dbSNP132    | freq  | Sanger Seq | Phenotype | PolyPhen      | MutPred          | SIFT Score      | Mutation Taster |
|-------------|-------|------------|-----------|---------------|------------------|-----------------|-----------------|
| rs141859946 | 0.001 | not done   | EVC       | BENIGN, 0.123 | BENIGN, p= 0.309 | TOLERATED, 0.71 | BENIGN, p=0.99  |

(novel) . validated -

| dbSNP132    | freq | Sanger Seq | Phenotype | PolyPhen      | MutPred           | SIFT Score      | Mutation Taster         |
|-------------|------|------------|-----------|---------------|-------------------|-----------------|-------------------------|
| rs140107244 | 0.00 | not done   | -         | BENIGN, 0.121 | BENIGN, p = 0.352 | TOLERATED, 0.59 | DISEASE CAUSING, p=0.99 |
| (novel)     | -    | validated  | -         |               |                   |                 |                         |
| rs201256045 | NA   | validated  | -         | BENIGN, 0.013 | BENIGN, p = 0.252 | DAMAGING, 0.01  | DISEASE CAUSING, p=0.99 |
